# Supplementary material
Source: MDPI journal article supplement (https://www.mdpi.com/2673-8112/3/1/4)
Supplement: s1 [file s1 › covid-2059722-supplementary.pdf]

## Article

# Mitigation of Socio-Economical Inequalities on the Profile of Healthcare Workers Infected with SARS-CoV-2 upon Vaccination: The Experience of a Brazilian Public Healthcare Institution during the Omicron Wave

Maria Celia Chaves Zuma <sup>1,2,3,†</sup>, Roberta Soares Faccion <sup>1,2,3,†</sup>, Ana Carolina Carioca da Costa <sup>3</sup>,  
Leonardo Henrique Ferreira Gomes <sup>1,3</sup>, Daniella Campelo Batalha Cox Moore <sup>4,5</sup>, Saint Clair Gomes Junior <sup>3</sup>,  
Adriana Cesar Bonomo <sup>6,7,8</sup>, Wilson Savino <sup>6,7,8,\*</sup>, Sotiris Missailidis <sup>9</sup> and Zilton Farias Meira Vasconcelos <sup>1,3,\*</sup>

<sup>1</sup> Laboratório de Alta Complexidade (LACIFF), Instituto Nacional de Saúde da Mulher, da Criança e do Adolescente Fernandes Figueira (IFF), Fundação Oswaldo Cruz (FIOCRUZ), Rio de Janeiro 22250-020, Brazil

<sup>2</sup> Programa de Pós-Graduação em Pesquisa Aplicada à Saúde da Criança e da Mulher, IFF, FIOCRUZ, Rio de Janeiro 22250-020, Brazil

<sup>3</sup> Unidade de Pesquisa Clínica, IFF, FIOCRUZ, Rio de Janeiro 22250-020, Brazil

<sup>4</sup> Departamento de Pediatria, Unidade de Terapia Intensiva, IFF, FIOCRUZ, Rio de Janeiro 22250-020, Brazil

<sup>5</sup> Departamento de Medicina Clínica, Universidade Federal Fluminense (UFF), Niterói 24030-210, RJ, Brazil

<sup>6</sup> Laboratório de Pesquisas sobre o Timo, Instituto Oswaldo Cruz (IOC), FIOCRUZ, Rio de Janeiro 21045-900, Brazil

<sup>7</sup> Instituto Nacional de Ciência e Tecnologia em Neuroimunomodulação (INCT/NIM), IOC, FIOCRUZ, Rio de Janeiro 21045-900, Brazil

<sup>8</sup> Rede FAPERJ de Pesquisa em Neuroinflamação, IOC, FIOCRUZ, Rio de Janeiro 21045-900, Brazil

<sup>9</sup> Laboratório de Tecnologia Imunológica, Instituto de Tecnologia em Imunobiológicos, Bio-Manguinhos, Fiocruz, Rio de Janeiro 21040-900, Brazil

\* Correspondence: wilson.savino@fiocruz.br or savino.w@gmail.com (W.S.);

zilton.vasconcelos@fiocruz.br or zvasconcelos@gmail.com (Z.F.M.V.)

† These authors contributed equally to this work.

## Supplementary Material

*Table S1: Types and number of means of transportation to work used by IFF/Fiocruz workers according to SARS-CoV-2 test result.*

*Table S2: Logistic regression model of IFF/Fiocruz workforce according to gender and types of work activities.*

*Table S3: Socio-demographic and types of work activities data on IFF/Fiocruz healthcare workers tested for SARS-CoV-2 during the Omicron wave and the Original outbreak.*

*Figure S1: Frequency of occurrence of SARS-CoV-2 relevant variants in the state of Rio de Janeiro.*

Table S1. Types and number of means of transportation to work used by IFF/Fiocruz workers according to SARS-CoV-2 test results.

| Variables                  | SARS-CoV-2 test result |      |          |      | p-value * |
|----------------------------|------------------------|------|----------|------|-----------|
| Means of Transportation    | Negative               |      | Positive |      |           |
|                            | n                      | %    | n        | %    |           |
| Bus                        |                        |      |          |      |           |
| No                         | 33                     | 38.4 | 53       | 61.6 | 1.000     |
| Yes                        | 36                     | 38.7 | 57       | 61.3 |           |
| Train/Subway               |                        |      |          |      |           |
| No                         | 55                     | 37.4 | 92       | 62.6 | 0.641     |
| Yes                        | 14                     | 43.7 | 18       | 56.3 |           |
| Taxi/Private Car Service   |                        |      |          |      |           |
| No                         | 64                     | 37.6 | 106      | 62.3 | 0.469     |
| Yes                        | 5                      | 55.6 | 4        | 44.4 |           |
| Own Car/Motorcycle/Walking |                        |      |          |      |           |
| No                         | 39                     | 40.2 | 58       | 59.8 | 0.733     |
| Yes                        | 30                     | 36.6 | 52       | 63.4 |           |

\* Pearson's chi-square test; significant result: p-value < 0.05.

Table S2. Logistic regression model of IFF/Fiocruz workforce according to gender and types of work activities.

| Variables                               | Crude Odds Ratio<br>(95% CI) <sup>a</sup> | Adjusted Odds Ratio (95% CI) <sup>a</sup> | p-value * |
|-----------------------------------------|-------------------------------------------|-------------------------------------------|-----------|
| <b>Gender</b>                           |                                           |                                           |           |
| Male                                    | 1.0                                       | 1.0                                       | 0.355     |
| Female                                  | 1.77 (1.06 – 2.98)                        | 1.40<br>(0.69 – 2.85)                     |           |
| <b>Workplace exposure to SARS-CoV-2</b> |                                           |                                           |           |
| Low exposure                            | 1.0                                       | 1.0                                       | 0.991     |
| Medium exposure                         | 0.97 (0.28 – 3.33)                        | 1.01 (0.29 – 3.48)                        |           |
| High exposure                           | 2.30 (1.22 – 4.32)                        | 2.20 (1.16 – 4.17)                        |           |
| <b>Occupation</b>                       |                                           |                                           |           |
| Healthcare professionals                | 1.0                                       | 1.0                                       | 0.872     |
| Support workers                         | 0.78 (0.50 - 1.20)                        | 1.06 (0.53 - 2.13)                        |           |

\* Significant result: p-value < 0.05. <sup>a</sup> Odds Ratios were adjusted by gender, workplace level of exposure, and Occupation. CI: Confidence Interval.

Table S3. Socio-demographic and types of work activities data on IFF/Fiocruz healthcare workers tested for SARS-CoV-2 during the Omicron wave and the Original outbreak.

| Variable                                    | Omicron outbreak |       | Original outbreak |       |
|---------------------------------------------|------------------|-------|-------------------|-------|
|                                             | n                | % *   | n                 | % *   |
| Total                                       | 351              | 100%  | 1141              | 100%  |
| Race                                        |                  |       |                   |       |
| White                                       | 165              | 47%   | 568               | 50.3% |
| Non-white                                   | 186              | 53%   | 561               | 49.7% |
| Gender                                      |                  |       |                   |       |
| Female                                      | 272              | 77.5% | 848               | 74.6% |
| Male                                        | 79               | 22.5% | 289               | 25.4% |
| Age                                         |                  |       |                   |       |
| 18-30                                       | 38               | 8.0%  | 257               | 22.9% |
| 31-45                                       | 149              | 42.8% | 462               | 41.1% |
| 46-60                                       | 135              | 38.8% | 347               | 30.9% |
| Over 60                                     | 26               | 7.4%  | 57                | 5.1%  |
| Income                                      |                  |       |                   |       |
| ≤ 3 MW                                      | 110              | 33%   | 396               | 36.0% |
| 4-5 MW                                      | 46               | 14%   | 157               | 14.3% |
| More than 5 and ≤ 10 MW                     | 92               | 27%   | 264               | 24.0% |
| More than 10 MW                             | 85               | 26%   | 282               | 25.7% |
| Schooling                                   |                  |       |                   |       |
| Complete secondary school or less           | 72               | 27%   | 353               | 31.2% |
| Complete undergraduate university           | 76               | 28%   | 310               | 27.4% |
| More than complete undergraduate university | 120              | 45%   | 468               | 41.4% |
| Private health care plan                    |                  |       |                   |       |
| No                                          | 66               | 20%   | 231               | 20.2% |
| Yes                                         | 269              | 80%   | 879               | 79.2% |
| Number of residents in household            |                  |       |                   |       |
| Living alone                                | 26               | 10%   | 116               | 11.8% |
| 2 to 4 residents                            | 206              | 77%   | 743               | 75.4% |
| 5 to 8 residents                            | 36               | 13%   | 126               | 12.8% |
| Occupation                                  |                  |       |                   |       |
| Healthcare professionals                    | 198              | 56.7  | 748               | 69.8% |
| Support workers                             | 151              | 43.3  | 324               | 30.2% |
| Level of workplace exposure to SARS-CoV-2   |                  |       |                   |       |
| Low exposure                                | 65               | 31.4  | 223               | 21.2% |
| Medium exposure                             | 12               | 5.8   | 116               | 11.0% |
| High exposure                               | 130              | 62.8  | 713               | 67.8% |

\* Percentages calculated excluding cases with missing information. One monthly minimum wage (MW) = BRL 1,045.00 or US\$ 195.00.

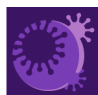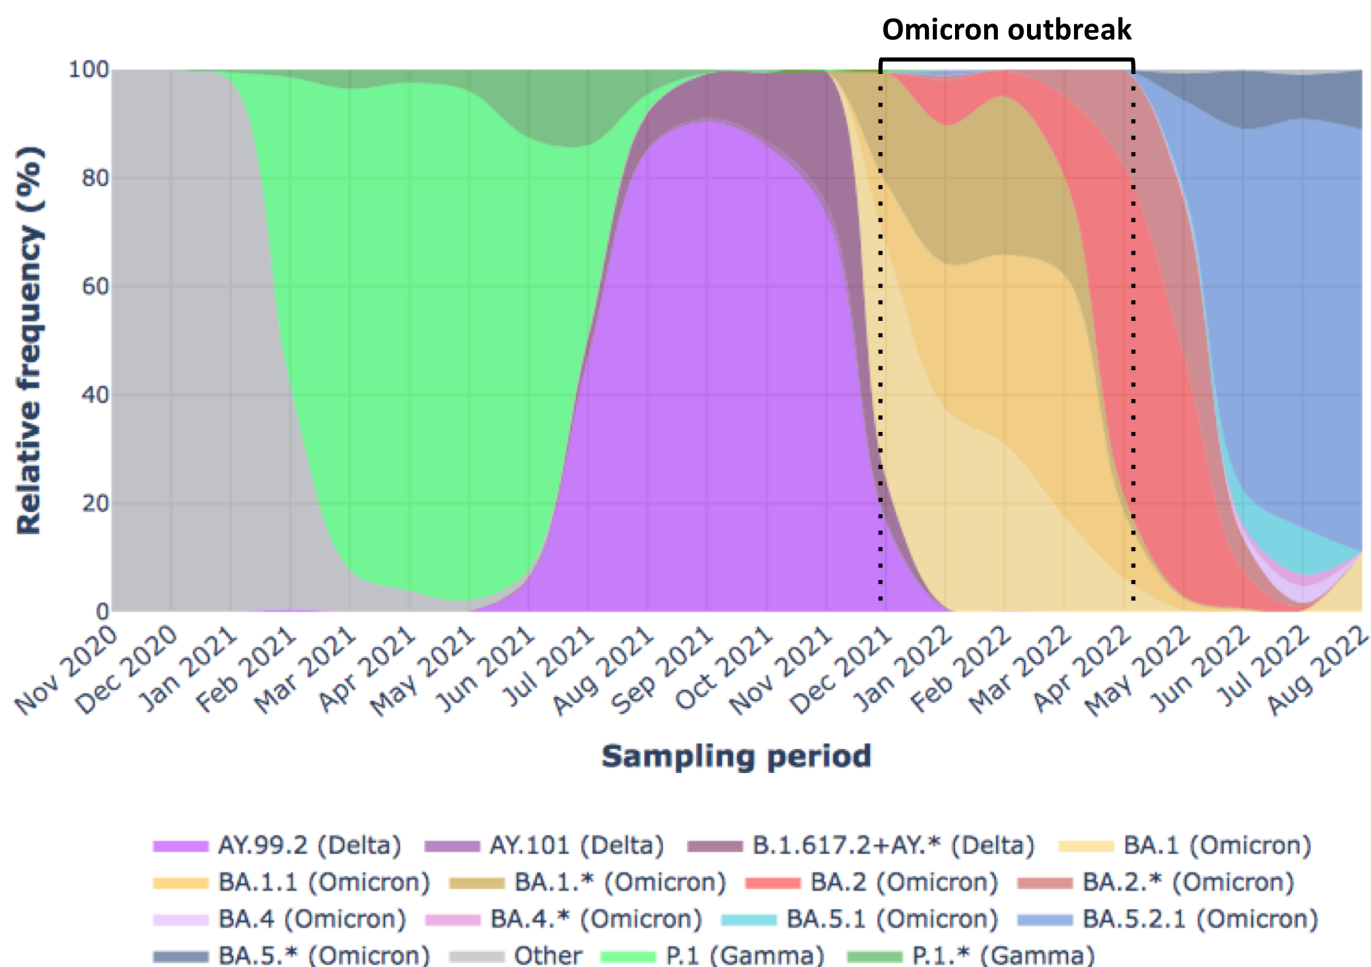

Figure S1. Frequency of occurrence of SARS-CoV-2 relevant variants in the state of Rio de Janeiro. The Omicron outbreak (between December 2021 and March 2022) is depicted. Adapted from the website for the "SARS-CoV-2 Genomic Surveillance in Brazil" network accessed in 30/09/2022 (20).
